# Supplementary material
Source: PubMed Central journal article supplement (PMC8758151)
Supplement: mmc1.pdf [file mmc1.pdf]

# THE LANCET

## Digital Health

### Supplementary appendix

This appendix formed part of the original submission. We post it as supplied by the authors.

Supplement to: Barr E, Whitaker D, Stratton P. Pregnancy and SARS-CoV-2: an opportunity to systematically study the complexity of maternal health. *Lancet Digit Health* 2022; published online Jan 13. [https://doi.org/10.1016/S2589-7500\(21\)00277-6](https://doi.org/10.1016/S2589-7500(21)00277-6).

## **Pregnancy and SARS-CoV-2: an opportunity to systematically study the complexity of maternal health**

Acknowledgements: We would like to recognize Nikeya Macioce, Ph.D., Rajeev K. Agarwal, Ph.D., and our ORWH colleagues for their constructive comments and teamwork in the development of the ORWH COVID-19 Guiding Principles. We also thank the Coordinating Committee for Research on Women's Health (CCRWH)'s COVID working group led by Co-Chairs Rajeev K. Agarwal, Ph.D., Marrah Lachowicz-Scroggins, Ph.D., and Nina Schor, M.D., Ph.D., as well Koyeli Banerjee, Ph.D. for skillfully leading a landscape analysis of the NIH COVID-19 portfolio. We thank Elena Gorodetsky, M.D., Ph.D. for her strategic thinking about pregnancy and COVID, Samia Noursi, Ph.D., Dave Thomas, Ph.D., Jamie White, M.S. and the rest of the ORWH Committee on Maternal Health for their continued work on maternal health. We are grateful to Sarah Temkin, M.D. for providing critical comments on this manuscript and Janine Clayton, M.D. for her strategic vision for women's health research and her careful review of this manuscript.
